# Supplementary material for: Body transfer illusions in the schizophrenia spectrum: a systematic review
Source: PubMed Central journal article supplement (PMC9691625; doi:10.1038/s41537-022-00314-z), 2022-11-23
Supplement: 41537_2022_314_MOESM1_ESM.pdf [file 41537_2022_314_MOESM1_ESM.pdf]

| Study                                                    | Study population                            |                                                                                                                 | Paradigm                               | Study quality  |                      |                      |                          |                      |                     |                 |                |
|----------------------------------------------------------|---------------------------------------------|-----------------------------------------------------------------------------------------------------------------|----------------------------------------|----------------|----------------------|----------------------|--------------------------|----------------------|---------------------|-----------------|----------------|
|                                                          | <i>N (male)</i>                             | <i>Sample</i>                                                                                                   |                                        | <i>RoB (%)</i> | <i>Randomization</i> | <i>Control-group</i> | <i>Control-condition</i> | <i>Control-items</i> | <i>Registration</i> | <i>Blinding</i> | <i>Overall</i> |
| Peled et al. (2000)                                      | SCZ = 26 (20)<br>HC = 23 (10)               | Adults with schizophrenia                                                                                       | Classical RHI                          | 83             | -                    | +                    | -                        | -                    | -                   | -               | 1              |
| Peled et al. (2003)                                      | SCZ = 19 (16)<br>HC = 19 (17)               | Adults with schizophrenia                                                                                       | Classical RHI                          | 83             | -                    | +                    | -                        | -                    | -                   | -               | 1              |
| Asai et al. (2011)                                       | 72 (36)                                     | Healthy adults                                                                                                  | Classical RHI                          | 83             | +                    | -                    | -                        | -                    | -                   | -               | 1              |
| Thakkar et al. (2011)                                    | SCZ = 24 (15)<br>HC = 21 (11)               | Adults with schizophrenia                                                                                       | Classical RHI                          | 50             | +                    | +                    | +                        | -                    | -                   | -               | 3              |
| Germine et al. (2013)                                    | 55 (20)                                     | Healthy adults                                                                                                  | Classical RHI                          | 83             | -                    | -                    | +                        | -                    | -                   | -               | 1              |
| Ferri et al. (2014)                                      | SCZ = 21 (21)<br>HC = 17 (17)               | Adults with schizophrenia                                                                                       | RHI derivate<br>(expectation of touch) | 50             | +                    | +                    | +                        | -                    | -                   | -               | 3              |
| Graham, Martin-Iverson, Holmes, Jablensky, et al. (2014) | SCZ = 53 (36); HC = 48 (24)                 | Adults with schizophrenia or schizoaffective disorder – sub-division: never, past or current passivity symptoms | Projected Hand Illusion                | 50             | +                    | +                    | +                        | -                    | -                   | -               | 3              |
| Graham, Martin-Iverson, Holmes, & Waters (2014)          | HC = 48 (24)                                | Healthy adults                                                                                                  | Projected Hand Illusion                | 67             | +                    | -                    | +                        | -                    | -                   | -               | 2              |
| Kaplan et al. (2014)                                     | SCZ = 17 (4)<br>BDD = 17 (4)<br>HC = 17 (4) | Adults with schizophrenia/ schizoaffective disorder and adults with BDD                                         | Classical RHI                          | 33             | +                    | +                    | +                        | +                    | -                   | -               | 4              |
| Kállai et al. (2015)                                     | HC = 48 (20)                                | Healthy adults                                                                                                  | Classical RHI                          | 33             | +                    | -                    | +                        | +                    | -                   | +               | 4              |

|                              |                                                                                                                           |                                                                                                                                                                                                |                                        |    |   |   |   |   |   |   |   |
|------------------------------|---------------------------------------------------------------------------------------------------------------------------|------------------------------------------------------------------------------------------------------------------------------------------------------------------------------------------------|----------------------------------------|----|---|---|---|---|---|---|---|
| Lev-Ari et al. (2015)        | SCZ = 30 (24); HC = 30 (15)                                                                                               | Adults with schizophrenia                                                                                                                                                                      | Classical RHI                          | 83 | - | + | - | - | - | - | 1 |
| Louzolo et al. (2015)        | HC = 71 (30)                                                                                                              | Healthy adults                                                                                                                                                                                 | Moving RHI                             | 50 | + | - | + | + | - | - | 3 |
| Mirucka (2016)               | SCZ = 31(17); HC = 33 (10)                                                                                                | Adults with schizophrenia                                                                                                                                                                      | Classical RHI                          | 83 | - | + | - | - | - | - | 1 |
| Graham-Schmidt et al. (2018) | SCZ = 51(35); HC = 47(24)                                                                                                 | Adults with schizophrenia or schizoaffective disorder - subdivision: never, past or current passivity symptoms                                                                                 | Projected Hand Illusion                | 67 | - | + | + | - | - | - | 2 |
| Shaqiri et al. (2018)        | SCZ = 59 (44); HC = 30 (16)                                                                                               | Adults with schizophrenia                                                                                                                                                                      | Full Body Illusion                     | 33 | + | + | + | + | - | - | 4 |
| Prikken et al. (2019)        | Cohort 1: SCZ = 54 (46); HC = 56 (52)<br>Cohort 2: SCZ-risk = 24 (6); Mood disorder risk = 33 (15); HC children = 18 (13) | Cohort 1: Adults with schizophrenia<br>Cohort 2: Children / adolescents with increased familiar risk of schizophrenia and children / adolescents with increased familiar risk of mood disorder | Classical RHI                          | 50 | + | + | + | - | - | - | 3 |
| Costantini et al. (2020)     | SCZ = 22 (22); HC = 22 (22)                                                                                               | Adults with schizophrenia                                                                                                                                                                      | Classical RHI                          | 67 | + | - | + | - | - | - | 2 |
| Rossetti et al. (2020)       | SCZ = 29 (18); HC = 36 (6)                                                                                                | Adults with schizophrenia                                                                                                                                                                      | Mirror Box                             | 50 | + | + | + | - | - | - | 3 |
| Zopf et al.,( 2020)          | SCZ = 23 (15); HC = 21 (12)                                                                                               | Adults with schizophrenia or schizoaffective disorder                                                                                                                                          | Classical RHI + LED/tactor stimulation | 50 | + | + | + | - | - | - | 3 |
| Laurin et al. (2021)         | FRS+ = 31 (23)<br>FRS- = 25 (11)                                                                                          | Adults with schizophrenia with first rank symptoms (FRS+) and without first rank symptoms (FRS-)                                                                                               | Moving RHI                             | 50 | + | - | + | + | - | - | 3 |
